# Supplementary material for: Mechanism of Action of Antitumor Au(I) N-Heterocyclic Carbene Complexes: A Computational Insight on the Targeting of TrxR Selenocysteine
Source: MDPI journal article supplement (doi:10.3390/ijms25052625), 2024-02-23
Supplement: s1 [file s1]

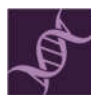

## Supporting Information for:

# Mechanism of Action of Antitumor Au(I) N-Heterocyclic Carbene Complexes: A Computational Insight on the Targeting of TrxR Selenocysteine

Iogann Tolbatov <sup>1,\*</sup>, Paolo Umari <sup>1</sup> and Alessandro Marrone <sup>2</sup>

<sup>1</sup> Department of Physics and Astronomy, University of Padova, Via F. Marzolo 8, 35131 Padova, Italy; paolo.umari@unipd.it

<sup>2</sup> Dipartimento di Farmacia, Università “G d’Annunzio” di Chieti-Pescara, Via dei Vestini 31, 66100 Chieti, Italy; amarrone@unich.it

\* Correspondence: tolbatov.i@gmail.com

Cartesian coordinates for calculated transition state structures for the reaction of complex 1 with ethylselenolate via different mechanisms:

### No assistance:

|    |          |          |          |
|----|----------|----------|----------|
| Au | 0.16600  | 0.29100  | -0.01200 |
| C  | 3.63600  | -2.01500 | -1.00600 |
| C  | 4.15500  | -1.24700 | -0.01500 |
| N  | 3.14200  | -0.40800 | 0.40500  |
| C  | 1.99600  | -0.63400 | -0.28600 |
| N  | 2.31600  | -1.63200 | -1.14800 |
| H  | 5.15000  | -1.22500 | 0.41900  |
| C  | -3.21400 | -2.55000 | 1.19900  |
| C  | -3.83900 | -1.96700 | 0.14500  |
| N  | -2.90100 | -1.15600 | -0.46600 |
| C  | -1.70400 | -1.21300 | 0.16400  |
| N  | -1.91300 | -2.08200 | 1.18200  |
| H  | -4.86000 | -2.05800 | -0.21400 |
| H  | 4.08900  | -2.79100 | -1.61600 |
| H  | -3.58100 | -3.25000 | 1.94500  |
| C  | 3.26000  | 0.56700  | 1.48100  |
| H  | 4.31600  | 0.87300  | 1.53400  |
| H  | 2.66300  | 1.44200  | 1.18500  |
| C  | 2.77600  | 0.02400  | 2.81600  |
| C  | 1.39900  | -2.16000 | -2.14800 |
| H  | 1.70300  | -3.19400 | -2.36600 |
| H  | 0.40200  | -2.19000 | -1.68400 |
| C  | 1.37700  | -1.31300 | -3.41100 |
| C  | -3.16100 | -0.30900 | -1.62800 |
| C  | -2.36800 | -0.73900 | -2.85000 |
| H  | -4.24200 | -0.35300 | -1.82300 |
| H  | -2.90400 | 0.72600  | -1.35400 |
| C  | -0.91900 | -2.35800 | 2.20700  |

|    |          |          |          |
|----|----------|----------|----------|
| C  | -0.97500 | -1.35200 | 3.34700  |
| H  | -1.07900 | -3.38500 | 2.57100  |
| H  | 0.06400  | -2.32600 | 1.71500  |
| C  | 0.64900  | 3.83300  | -1.29700 |
| C  | -0.02100 | 3.81900  | 0.06800  |
| Se | -1.25800 | 2.31600  | 0.36100  |
| H  | 1.26000  | 2.92700  | -1.43500 |
| H  | 0.73600  | 3.80300  | 0.86600  |
| H  | -0.62000 | 4.73300  | 0.20900  |
| H  | -0.10100 | 3.85100  | -2.10300 |
| H  | 1.30300  | 4.71500  | -1.41300 |
| H  | -2.62400 | -0.10100 | -3.70700 |
| H  | -1.29200 | -0.62600 | -2.65500 |
| H  | -2.57300 | -1.78700 | -3.11700 |
| H  | -0.19300 | -1.57000 | 4.08900  |
| H  | -0.82200 | -0.33300 | 2.95900  |
| H  | -1.95000 | -1.38200 | 3.85600  |
| H  | 2.89300  | 0.78700  | 3.59900  |
| H  | 1.70900  | -0.23400 | 2.75000  |
| H  | 3.34100  | -0.87200 | 3.11400  |
| H  | 0.65700  | -1.72400 | -4.13300 |
| H  | 1.07700  | -0.28300 | -3.16900 |
| H  | 2.36800  | -1.28300 | -3.88900 |

**Phosphate buffer assistance:**

|    |          |          |          |
|----|----------|----------|----------|
| Au | 0.59500  | -0.47700 | 0.03000  |
| C  | -2.58900 | -3.33700 | 0.32500  |
| C  | -2.23800 | -3.25000 | 1.63100  |
| N  | -1.18600 | -2.35600 | 1.69300  |
| C  | -0.87800 | -1.87500 | 0.46300  |
| N  | -1.74900 | -2.49200 | -0.37300 |
| H  | -2.63900 | -3.74000 | 2.51300  |
| C  | 1.27800  | 3.78300  | 1.25400  |
| C  | 1.02400  | 4.01200  | -0.06000 |
| N  | 0.53400  | 2.82900  | -0.57700 |
| C  | 0.48300  | 1.86000  | 0.36800  |
| N  | 0.93400  | 2.46800  | 1.49200  |
| H  | 1.14500  | 4.91300  | -0.65400 |
| H  | -3.35800 | -3.92600 | -0.16600 |
| H  | 1.66200  | 4.44000  | 2.02900  |
| C  | -0.60600 | -1.88100 | 2.94200  |
| H  | -0.46900 | -2.74600 | 3.60700  |
| H  | 0.39300  | -1.49100 | 2.70300  |
| C  | -1.47200 | -0.81300 | 3.59300  |
| C  | -1.82300 | -2.29600 | -1.82000 |
| H  | -2.80200 | -2.68500 | -2.13200 |
| H  | -1.84300 | -1.21100 | -2.00100 |
| C  | -0.70600 | -2.99800 | -2.57400 |
| C  | 0.12400  | 2.64000  | -1.96600 |
| C  | -0.86300 | 3.69700  | -2.43200 |
| H  | 1.02600  | 2.62500  | -2.59800 |
| H  | -0.36700 | 1.65900  | -2.01000 |
| C  | 1.09500  | 1.80400  | 2.77800  |
| C  | 2.54400  | 1.46000  | 3.08300  |
| H  | 0.66900  | 2.45500  | 3.55700  |
| H  | 0.48000  | 0.89700  | 2.73600  |
| C  | 3.12300  | -2.91600 | -1.71800 |

|    |          |          |          |
|----|----------|----------|----------|
| C  | 3.90300  | -1.84800 | -0.96800 |
| Se | 3.00300  | -0.09700 | -0.79300 |
| H  | 2.19300  | -3.17100 | -1.18700 |
| H  | 4.15500  | -2.20700 | 0.04100  |
| H  | 4.85500  | -1.64600 | -1.48200 |
| P  | -3.37100 | 1.03800  | -0.60800 |
| O  | -3.90000 | 2.59800  | -0.76900 |
| O  | -2.45700 | 0.80000  | -1.78500 |
| O  | -4.55800 | 0.16500  | -0.31800 |
| O  | -2.47800 | 1.13400  | 0.76800  |
| H  | -1.52300 | 1.15800  | 0.56200  |
| H  | -4.68400 | 2.72600  | -0.22400 |
| H  | 2.84800  | -2.57500 | -2.72800 |
| H  | 3.71800  | -3.83900 | -1.81900 |
| H  | -1.16600 | 3.47500  | -3.46600 |
| H  | -1.76600 | 3.67700  | -1.80500 |
| H  | -0.43400 | 4.71000  | -2.42200 |
| H  | 2.60700  | 0.91900  | 4.03800  |
| H  | 2.96000  | 0.82700  | 2.28500  |
| H  | 3.16000  | 2.36800  | 3.16500  |
| H  | -0.96800 | -0.40100 | 4.47900  |
| H  | -1.67500 | -0.00000 | 2.87900  |
| H  | -2.43800 | -1.23200 | 3.91300  |
| H  | -0.84700 | -2.85900 | -3.65600 |
| H  | 0.27300  | -2.58000 | -2.30200 |
| H  | -0.69600 | -4.07800 | -2.36300 |

**Reaction with the CysSec peptide:**

|    |          |          |          |
|----|----------|----------|----------|
| Au | 1.55300  | -0.52600 | 0.39400  |
| C  | 5.78800  | -0.75600 | 0.01300  |
| C  | 5.68400  | 0.58500  | 0.18800  |
| N  | 4.33900  | 0.85800  | 0.34000  |
| C  | 3.60000  | -0.27500 | 0.28200  |
| N  | 4.50600  | -1.26300 | 0.08100  |
| H  | 6.44500  | 1.36000  | 0.21500  |
| C  | 0.26100  | 2.45400  | -3.10000 |
| C  | 0.20000  | 3.29200  | -2.03600 |
| N  | 0.36600  | 2.50600  | -0.91000 |
| C  | 0.52100  | 1.19600  | -1.23100 |
| N  | 0.45800  | 1.18600  | -2.58300 |
| H  | 0.04500  | 4.36600  | -1.99800 |
| C  | 3.78600  | 2.17900  | 0.60500  |
| H  | 4.50400  | 2.91800  | 0.22100  |
| H  | 2.86900  | 2.27100  | 0.00900  |
| C  | 3.50500  | 2.40400  | 2.08300  |
| C  | 4.16100  | -2.66900 | -0.09800 |
| H  | 5.03400  | -3.26200 | 0.21100  |
| H  | 3.33800  | -2.89000 | 0.59700  |
| C  | 3.75400  | -2.99100 | -1.52700 |
| C  | 0.21000  | 2.96600  | 0.46500  |
| C  | 0.72300  | 4.37600  | 0.69500  |
| H  | -0.85900 | 2.91000  | 0.71600  |
| H  | 0.73900  | 2.23900  | 1.09700  |
| C  | 0.49400  | -0.02800 | -3.38500 |
| C  | -0.83600 | -0.30800 | -4.07100 |
| H  | 1.31000  | 0.05600  | -4.12100 |
| H  | 0.75800  | -0.83900 | -2.69200 |

|    |          |          |          |
|----|----------|----------|----------|
| Se | -0.59400 | -1.61600 | 1.09600  |
| H  | 0.67900  | 4.60900  | 1.76900  |
| H  | 1.76400  | 4.49700  | 0.35800  |
| H  | 0.10200  | 5.12200  | 0.17800  |
| H  | -0.80100 | -1.28400 | -4.57600 |
| H  | -1.66300 | -0.31300 | -3.34600 |
| H  | -1.06300 | 0.45400  | -4.83200 |
| H  | 3.08200  | 3.40600  | 2.24000  |
| H  | 2.78400  | 1.65900  | 2.45200  |
| H  | 4.42500  | 2.31900  | 2.68000  |
| H  | 3.51200  | -4.06000 | -1.61800 |
| H  | 2.86100  | -2.41300 | -1.80600 |
| H  | 4.56100  | -2.75600 | -2.23700 |
| N  | -2.83500 | 1.30300  | 1.33500  |
| C  | -3.96400 | 1.27300  | 0.42600  |
| C  | -3.68400 | 0.17900  | -0.61400 |
| N  | -3.55500 | -1.05600 | -0.07300 |
| O  | -3.55400 | 0.41000  | -1.80400 |
| C  | -2.92000 | 1.89900  | 2.55700  |
| C  | -4.32400 | 2.62300  | -0.19800 |
| S  | -2.99800 | 3.50200  | -1.07400 |
| H  | -4.85800 | 0.96900  | 1.00300  |
| H  | -4.63600 | 3.29200  | 0.61400  |
| H  | -5.17800 | 2.48300  | -0.87500 |
| H  | -2.77900 | 2.54300  | -1.99600 |
| H  | -2.01400 | 0.73100  | 1.12800  |
| C  | -2.84900 | -2.10600 | -0.78100 |
| C  | -3.39300 | -3.47500 | -0.33100 |
| O  | -4.48100 | -3.85200 | -0.72200 |
| N  | -2.59800 | -4.19500 | 0.49800  |
| H  | -3.53400 | -1.11100 | 0.94000  |
| C  | -1.33600 | -1.87200 | -0.71900 |
| H  | -3.16100 | -2.03000 | -1.83300 |
| H  | -1.12100 | -0.94700 | -1.27100 |
| H  | -0.80800 | -2.69700 | -1.22000 |
| C  | -3.00000 | -5.47700 | 1.02100  |
| H  | -1.74400 | -3.76600 | 0.85300  |
| H  | -2.23800 | -6.24500 | 0.81600  |
| H  | -3.16800 | -5.43400 | 2.10900  |
| H  | -3.93900 | -5.76300 | 0.53100  |
| O  | -3.92100 | 2.48300  | 2.93000  |
| C  | -1.66200 | 1.80900  | 3.39700  |
| H  | -1.94900 | 1.63900  | 4.44300  |
| H  | -0.98100 | 1.01500  | 3.05900  |
| H  | -1.14000 | 2.77700  | 3.35000  |
| H  | 6.65800  | -1.38700 | -0.14900 |
| H  | 0.18100  | 2.65600  | -4.16500 |
